# Supplementary material for: Molecular dissection of TatC defines critical regions essential for protein transport and a TatB–TatC contact site
Source: PubMed Central journal article supplement (PMC3712464; doi:10.1111/j.1365-2958.2012.08151.x), 2012-07-13
Supplement: mmi0085-0945-SD1.pdf [file mmi0085-0945-SD1.pdf]

**Figure S1. Schematic representation of the *tatABC* region of plasmid pTAT1d.** The nucleotide sequence around the start and stop codons of the *tatABC* genes is shown, with the amino acid sequence beneath. Introduced restriction sites are underlined with nucleotides differing from the original sequence shown in bold and resulting amino acid changes italicised. The *tatC* mutant library was cloned as a *XhoI* - *PstI* fragment. epPCR – error prone PCR. Restriction sites are GGATCC – *Bam*HI; AGATCT – *Bg*II; CACGTG – *Pml*I; CTCGAG – *Xho*I; CTTAAG – *Afl*II; GTCGAC – *Sal*I; CTGCAG – *Pst*I.

**Figure S2. Production of TatC from plasmid pTAT101.** A. Total membrane fractions were prepared from strain MC4100 (*tat*<sup>+</sup>) and DADE ( $\Delta$ *tatABCD*,  $\Delta$ *tatE*) harbouring plasmid pTAT101 which encodes *tatABC*. The indicated amounts of total membrane protein were subjected to SDS-PAGE and subsequent immunoblotting using an anti-TatC antibody. B. The intensity of each band following Western blotting was quantified using ImageJ.

**Figure S3. Alignment of selected bacterial TatC proteins.** Protein sequences were aligned using jpred (Cole *et al.*, 2008); with predicted cytoplasmic residues shaded green, transmembrane in red and periplasmic in purple. Eco - *Escherichia coli*, Cje - *Campylobacter jejuni*, Dvu - *Desulfovibrio vulgaris*, Son - *Shewanella oneidensis*, Psy- *Pseudomonas syringae* pv tomato, Xor - *Xanthomonas oryzae* pv *oryzae*, Lph - *Legionella pneumophila* subsp *pneumophila*, Dda - *Dickeya dadantii*, Bsu\_C<sub>d</sub>- *Bacillus subtilis* TatCd, Bsu\_Cy - *Bacillus subtilis* TatC<sub>y</sub>, Syn - *Synechocystis* sp, Sau - *Staphylococcus aureus*, Sli - *Streptomyces lividans*, Atu - *Agrobacterium tumefaciens*, Mxa - *Myxococcus xanthus*, Yps - *Yersinia pseudotuberculosis*, Msm - *Mycobacterium smegmatis*.

| clone | TatC mutation/s                                                                 |
|-------|---------------------------------------------------------------------------------|
| 103   | V64A                                                                            |
| 104   | S79L G144R E257G                                                                |
| 105   | P48S A133V                                                                      |
| 110   | F94S Y154C                                                                      |
| 111   | R17C I60N D188V                                                                 |
| 113   | L16Q L74Q L82P P209S T216A                                                      |
| 117   | L16P L53S                                                                       |
| 123   | Q215R                                                                           |
| 124   | Q52L G144E Q146R S153I                                                          |
| 126   | M205K S214P                                                                     |
| 128   | L20P Y154H                                                                      |
| 130   | C33S S66P L74P K192E                                                            |
| 132   | I25N F31I I60F F68S P131T aa251-258 AESEKTEE→QKRKTEE                            |
| 133   | M59K V198D                                                                      |
| 138   | D63V                                                                            |
| 139   | P67S P131S I183T                                                                |
| 201   | A47S F68L I175F Y223C Stop TAA→TAT 14 aa C-terminal<br>extension YGCSPSLSMISCQT |
| 205   | L9H C23R A26V S57P G199S                                                        |
| 207   | Q52L G144E Q146R S153I                                                          |
| 209   | V35D F68S S115Y I175V L177P L178P F213S E252G                                   |
| 212   | L116P F124S V176E L217P                                                         |
| 214   | S66P A98V                                                                       |
| 224   | V64E F232S                                                                      |
| 225   | L137H A141E F232L                                                               |
| 226   | G204R frameshift aa 241 altering C-terminus                                     |

303 F157Y  
311 A160T  
318 A160V A219E  
321 V3A P67S E103K  
323<sup>a</sup> M163K M205K  
328<sup>a</sup> P48L  
329 H12R P109A A160V  
333 L34P H43Y A25T T208A  
335<sup>a</sup> S148P  
336<sup>a</sup> L137H S214P  
341<sup>a</sup> L20P L111P E143G  
344 D63V Y100C  
351 R19C P54L R105C  
354<sup>a</sup> F37S Q90R F94L  
360 L49S E103G P210T  
366<sup>a</sup> N39S P54L  
367<sup>a</sup> C23R  
368 F68S  
375 Y42N L99P  
403 H12R R17H  
407 R19C P54L F130S P209L A219S  
409 E103G G229D  
411 H12R I87T S168P T216S  
415 L16P  
434 G121D M205R  
437<sup>a</sup> L99P  
440 L116R L155V

441 I72F V145E P209L G238D  
445 P54S D150G T184S  
446 L74P Y89C S113I F130I  
447 Y42C S46F D150V 14aa N-terminal extension as 201  
451 E15G I151T  
457 P97T V203I L225P  
470 T62A M222I  
475 L9H A65T P71A S79L L99Q D150N D201N E250V  
479 C23R I41N L206M M222L  
482 M59K  
485 C23R N139K E227K  
490 R19S F94I Q146K F149I  
495 L99Q L178Q  
496 C33Y A38T H43Y S57L S158P W180R D248G  
497 S148P V168A  
510<sup>a</sup> E15G E103G F127I L217P  
513 L82Q P85L  
519 P48S  
521 P8S A47T Y100H L111P  
523 L59S Q52L F94L  
533<sup>a</sup> S66P L106P  
544 L20P T70R A160T  
546 R104C P131L C224S  
549 A61T S148P E252Stop  
556 E15K R17S F165L  
557 S83T Y100C P210R  
558 L20P I60V F130L

---

**Table S1. Amino acid sequence changes found in clones isolated from the *tatC* mutant library giving rise to an inactive Tat system.** Note that clones containing frame shifts in the essential or stop codons in the region of TatC up to the end of transmembrane helix 6 are not included.

| Plasmid        | Description                                                                                                                | Reference                            |
|----------------|----------------------------------------------------------------------------------------------------------------------------|--------------------------------------|
| pTH19kr        | Low copy-number cloning vector (kan <sup>r</sup> )                                                                         | Hashimoto-Gotoh <i>et al.</i> (2000) |
| pTAT1          | pUNI-PROM carrying <i>E. coli</i> <i>tatABC</i> from pUNITAT1                                                              | This work                            |
| pTAT1d         | pUNI-PROM carrying <i>E. coli</i> <i>tatABC</i> with engineered restriction sites allowing facile replacement of each gene | Maldonado <i>et al.</i> (2011b)      |
| pTTC1          | pSU40 encoding TorA <sub>ss</sub> -CAT fusion                                                                              | Maldonado <i>et al.</i> (2011b)      |
| pTAT101        | pTH19kr carrying <i>tat</i> promoter and <i>tatABC</i> fragment from pTAT1                                                 | This work                            |
| pQE60          | Expression vector (amp <sup>r</sup> )                                                                                      | Qiagen                               |
| pUNITAT1       | <i>tatABC</i> operon in pQE60                                                                                              | Lee <i>et al.</i> (2006)             |
| pUNITATCC4     | <i>tatABC</i> operon in pQE60, all 4 cysteine codons in <i>tatC</i> substituted for alanine codons                         | Lee <i>et al.</i> (2006)             |
| pUNITAT2       | <i>tatABC</i> operon in pQE60, <i>tatC</i> fused to 3' hexahistidine coding sequence.                                      | McDevitt <i>et al.</i> (2005)        |
| pTAT101 C-E15G | As pTAT101 but TatC E15G exchange                                                                                          | This work                            |
| pTAT101 C-L16P | As pTAT101 but TatC L16P exchange                                                                                          | This work                            |
| pTAT101 C-R17H | As pTAT101 but TatC R17H exchange                                                                                          | This work                            |
| pTAT101 C-L20P | As pTAT101 but TatC L20P exchange                                                                                          | This work                            |
| pTAT101 C-C23R | As pTAT101 but TatC C23R exchange                                                                                          | This work                            |
| pTAT101 C-L34P | As pTAT101 but TatC L34P exchange                                                                                          | This work                            |
| pTAT101 C-Y42N | As pTAT101 but TatC Y42N exchange                                                                                          | This work                            |
| pTAT101 C-S46F | As pTAT101 but TatC S46F exchange                                                                                          | This work                            |
| pTAT101 C-A47T | As pTAT101 but TatC A47T exchange                                                                                          | This work                            |
| pTAT101 C-P48L | As pTAT101 but TatC P48L exchange                                                                                          | This work                            |
| pTAT101 C-P48S | As pTAT101 but TatC P48S exchange                                                                                          | This work                            |
| pTAT101 C-L49S | As pTAT101 but TatC L49S exchange                                                                                          | This work                            |
| pTAT101 C-L53P | As pTAT101 but TatC L53P exchange                                                                                          | This work                            |
| pTAT101 C-L53S | As pTAT101 but TatC L53S exchange                                                                                          | This work                            |
| pTAT101 C-P54L | As pTAT101 but TatC P54L exchange                                                                                          | This work                            |
| pTAT101 C-M59K | As pTAT101 but TatC M59K exchange                                                                                          | This work                            |
| pTAT101 C-I60N | As pTAT101 but TatC I60N exchange                                                                                          | This work                            |
| pTAT101 C-A61T | As pTAT101 but TatC A61T exchange                                                                                          | This work                            |

|                 |                                    |           |
|-----------------|------------------------------------|-----------|
| pTAT101 C-A61V  | As pTAT101 but TatC A61V exchange  | This work |
| pTAT101 C-T62A  | As pTAT101 but TatC T62A exchange  | This work |
| pTAT101 C-D63V  | As pTAT101 but TatC D63V exchange  | This work |
| pTAT101 C-V64A  | As pTAT101 but TatC V64A exchange  | This work |
| pTAT101 C-V64D  | As pTAT101 but TatC V64D exchange  | This work |
| pTAT101 C-V64E  | As pTAT101 but TatC V64E exchange  | This work |
| pTAT101 C-S66P  | As pTAT101 but TatC S66P exchange  | This work |
| pTAT101 C-P67S  | As pTAT101 but TatC P67S exchange  | This work |
| pTAT101 C-T70R  | As pTAT101 but TatC T70R exchange  | This work |
| pTAT101 C-L74P  | As pTAT101 but TatC L74P exchange  | This work |
| pTAT101 C-S79L  | As pTAT101 but TatC S79L exchange  | This work |
| pTAT101 C-L82Q  | As pTAT101 but TatC L82Q exchange  | This work |
| pTAT101 C-P85L  | As pTAT101 but TatC P85L exchange  | This work |
| pTAT101 C-Q90R  | As pTAT101 but TatC Q90R exchange  | This work |
| pTAT101 C-F94L  | As pTAT101 but TatC F94L exchange  | This work |
| pTAT101 C-F94S  | As pTAT101 but TatC F94S exchange  | This work |
| pTAT101 C-P97T  | As pTAT101 but TatC P97T exchange  | This work |
| pTAT101 C-A98V  | As pTAT101 but TatC A98V exchange  | This work |
| pTAT101 C-L99P  | As pTAT101 but TatC L99P exchange  | This work |
| pTAT101 C-L99Q  | As pTAT101 but TatC L99Q exchange  | This work |
| pTAT101 C-Y100C | As pTAT101 but TatC Y100C exchange | This work |
| pTAT101 C-E103G | As pTAT101 but TatC E103G exchange | This work |
| pTAT101 C-E103K | As pTAT101 but TatC E103K exchange | This work |
| pTAT101 C-R104C | As pTAT101 but TatC R104C exchange | This work |
| pTAT101 C-R105C | As pTAT101 but TatC R105C exchange | This work |
| pTAT101 C-P109A | As pTAT101 but TatC P109A exchange | This work |
| pTAT101 C-L111P | As pTAT101 but TatC L111P exchange | This work |
| pTAT101 C-L116P | As pTAT101 but TatC L116P exchange | This work |
| pTAT101 C-L116R | As pTAT101 but TatC L116R exchange | This work |
| pTAT101 C-G121D | As pTAT101 but TatC G121D exchange | This work |
| pTAT101 C-F130S | As pTAT101 but TatC F130S exchange | This work |
| pTAT101 C-P131L | As pTAT101 but TatC P131L exchange | This work |
| pTAT101 C-A133V | As pTAT101 but TatC A133V exchange | This work |
| pTAT101 C-L137H | As pTAT101 but TatC L137H exchange | This work |
| pTAT101 C-A141E | As pTAT101 but TatC A141E exchange | This work |
| pTAT101 C-E143G | As pTAT101 but TatC E143G exchange | This work |

|                 |                                    |           |
|-----------------|------------------------------------|-----------|
| pTAT101 C-G144R | As pTAT101 but TatC G144R exchange | This work |
| pTAT101 C-V145E | As pTAT101 but TatC V145E exchange | This work |
| pTAT101 C-V147E | As pTAT101 but TatC V147E exchange | This work |
| pTAT101 C-S148P | As pTAT101 but TatC S148P exchange | This work |
| pTAT101 C-D150G | As pTAT101 but TatC D150G exchange | This work |
| pTAT101 C-D150V | As pTAT101 but TatC D150V exchange | This work |
| pTAT101 C-I151T | As pTAT101 but TatC I151T exchange | This work |
| pTAT101 C-Y154H | As pTAT101 but TatC Y154H exchange | This work |
| pTAT101 C-F157Y | As pTAT101 but TatC F157Y exchange | This work |
| pTAT101 C-A160V | As pTAT101 but TatC A160V exchange | This work |
| pTAT101 C-M163K | As pTAT101 but TatC M163K exchange | This work |
| pTAT101 C-S168P | As pTAT101 but TatC S168P exchange | This work |
| pTAT101 C-D188V | As pTAT101 but TatC D188V exchange | This work |
| pTAT101 C-V198D | As pTAT101 but TatC V198D exchange | This work |
| pTAT101 C-G204R | As pTAT101 but TatC G204R exchange | This work |
| pTAT101 C-M205K | As pTAT101 but TatC M205K exchange | This work |
| pTAT101 C-M205R | As pTAT101 but TatC M205R exchange | This work |
| pTAT101 C-P209L | As pTAT101 but TatC P209L exchange | This work |
| pTAT101 C-P210R | As pTAT101 but TatC P210R exchange | This work |
| pTAT101 C-S214P | As pTAT101 but TatC S214P exchange | This work |
| pTAT101 C-Q215R | As pTAT101 but TatC Q215R exchange | This work |
| pTAT101 C-A219E | As pTAT101 but TatC A219E exchange | This work |
| pTAT101 C-L225P | As pTAT101 but TatC L225P exchange | This work |
| pTAT101 C-ΔY42  | As pTAT101 but TatC Y42 deleted    | This work |
| pTAT101 C-ΔA47  | As pTAT101 but TatC A47 deleted    | This work |
| pTAT101 C-ΔK51  | As pTAT101 but TatC K51 deleted    | This work |
| pTAT101 C-ΔP54  | As pTAT101 but TatC P54 deleted    | This work |
| pTAT101 C-ΔG56  | As pTAT101 but TatC G56 deleted    | This work |
| pTAT101 C-ΔT58  | As pTAT101 but TatC T58 deleted    | This work |
| pTAT101 C-ΔA61  | As pTAT101 but TatC A61 deleted    | This work |
| pTAT101 C-ΔT62  | As pTAT101 but TatC T62 deleted    | This work |
| pTAT101 C-ΔA65  | As pTAT101 but TatC A65 deleted    | This work |
| pTAT101 C-ΔP67  | As pTAT101 but TatC P67 deleted    | This work |
| pTAT101 C-ΔT70  | As pTAT101 but TatC T70 deleted    | This work |
| pTAT101 C-ΔP71  | As pTAT101 but TatC P71 deleted    | This work |
| pTAT101 C-ΔK73  | As pTAT101 but TatC K73 deleted    | This work |



|                           |                                               |                                 |
|---------------------------|-----------------------------------------------|---------------------------------|
| pTAT101 C-ΔQ55-G56        | As pTAT101 but TatC Q55-G56 deleted           | This work                       |
| pTAT101 C-ΔG56-S57        | As pTAT101 but TatC G56-S57 deleted           | This work                       |
| pTAT101 C-iA42            | As pTAT101 but TatC A42 insertion             | This work                       |
| pTAT101 C-iA47            | As pTAT101 but TatC A47 insertion             | This work                       |
| pTAT101 C-iA51            | As pTAT101 but TatC A51 insertion             | This work                       |
| pTAT101 C-iA54            | As pTAT101 but TatC A54 insertion             | This work                       |
| pTAT101 C-iG56            | As pTAT101 but TatC G56 insertion             | This work                       |
| pTAT101 C-iGG56           | As pTAT101 but TatC GG56 insertion            | This work                       |
| pTAT101 C-iA58            | As pTAT101 but TatC A58 insertion             | This work                       |
| pTAT101 C-iA61            | As pTAT101 but TatC A61 insertion             | This work                       |
| pTAT101 C-iA65            | As pTAT101 but TatC A65 insertion             | This work                       |
| pTAT101 C-iA67            | As pTAT101 but TatC A67 insertion             | This work                       |
| pTAT101 C-iA70            | As pTAT101 but TatC A70 insertion             | This work                       |
| pTAT101 C-ΔA133           | As pTAT101 but TatC A133 deleted              | This work                       |
| pTAT101 C-ΔN139           | As pTAT101 but TatC N139 deleted              | This work                       |
| pTAT101 C-ΔP142           | As pTAT101 but TatC P142 deleted              | This work                       |
| pTAT101 C-ΔQ146           | As pTAT101 but TatC Q146 deleted              | This work                       |
| pTAT101 C-ΔA152           | As pTAT101 but TatC A152 deleted              | This work                       |
| pTAT101 C-ΔA160           | As pTAT101 but TatC A160 deleted              | This work                       |
| pTAT101 C-iA133           | As pTAT101 but TatC A133 insertion            | This work                       |
| pTAT101 C-iA139           | As pTAT101 but TatC A139 insertion            | This work                       |
| pTAT101 C-iA142           | As pTAT101 but TatC A142 insertion            | This work                       |
| pTAT101 C-iA146           | As pTAT101 but TatC A146 insertion            | This work                       |
| pTAT101 C-iA152           | As pTAT101 but TatC A152 insertion            | This work                       |
| pTAT101 C-iA160           | As pTAT101 but TatC A160 insertion            | This work                       |
| pTAT101 C-M205R B-F2L F6L | As pTAT101 C-M205R but TatB F2L F6L exchanges | This work                       |
| pTAT101 C-M205R B-F6L     | As pTAT101 C-M205R but TatB F6L exchange      | This work                       |
| pTAT101 C-M205R B-L9P     | As pTAT101 C-M205R but TatB L9P exchange      | This work                       |
| pUNIPLB6                  | As pUNITATCC4 but TatB F6C exchange           | Lee <i>et al.</i> (2006)        |
| pUNIPLB9                  | As pUNITATCC4 but TatB L9C exchange           | Lee <i>et al.</i> (2006)        |
| pUNIPLB11                 | As pUNITATCC4 but TatB L11C exchange          | Lee <i>et al.</i> (2006)        |
| pUNICPC169                | As pUNITATCC4 but TatC F169C exchange         | Punginelli <i>et al.</i> (2007) |

|                     |                                                                                                                                                              |                                 |
|---------------------|--------------------------------------------------------------------------------------------------------------------------------------------------------------|---------------------------------|
| pUNICPC205          | As pUNITATCC4 but TatC M205C exchange                                                                                                                        | Punginelli <i>et al.</i> (2007) |
| pUNIC M205C TatBF6C | As pUNICPC205 but additional TatB F6C exchange                                                                                                               | This work                       |
| pUNIC M205C TatBL9C | As pUNICPC205 but additional TatB L9C exchange                                                                                                               | This work                       |
| pUNITAT1-BCfuse     | As pUNITAT1, but with <i>tatB</i> and <i>tatC</i> genes fused together with an <i>XbaI</i> site. <i>tatB</i> stop codon and <i>tatC</i> start codon missing. | This work                       |
| pUNITAT2 TatC P48S  | As pUNITAT2 but TatC P48S exchange                                                                                                                           | This work                       |
| pUNITAT2 TatC I60N  | As pUNITAT2 but TatC I60N exchange                                                                                                                           | This work                       |
| pUNITAT2 TatC V64E  | As pUNITAT2 but TatC V64E exchange                                                                                                                           | This work                       |
| pUNITAT2 TatC F68S  | As pUNITAT2 but TatC F68S exchange                                                                                                                           | This work                       |
| pUNITAT2 TatC L137H | As pUNITAT2 but TatC L137H exchange                                                                                                                          | This work                       |
| pUNITAT2 TatC I151T | As pUNITAT2 but TatC I151T exchange                                                                                                                          | This work                       |
| pUNITAT2 TatC M205R | As pUNITAT2 but TatC M205R exchange                                                                                                                          | This work                       |

---

<sup>a</sup> mutants isolated multiple times

**Table S2. Plasmids used and constructed in this study.**

| Primer      | Sequence                     |
|-------------|------------------------------|
| TatBtmsupp1 | CGATAAAGAGCAGGTGTAACACGTG    |
| TatBtmsupp2 | ACAGGCAGTCGTTGCGGCC          |
| tatCm6      | CTTCCTCGAGTGATAAACCTTAAGCATG |
| tatCm7      | CCAAGCTTGCATGCCTGCAG         |
| C-E15Gf     | CGCATCTGATTGGGCTGCGTAAGCG    |
| C-E15Gr     | CGCTTACGCAGCCCAATCAGATGCG    |
| C-L16Pf     | CTGATTGAGCCGCGTAAGCGTC       |
| C-L16Pr     | GACGCTTACGCGGCTCAATCAG       |
| C-R17Hf     | CTGATTGAGCTGCATAAGCGTCTGC    |
| C-R17Hr     | GCAGACGCTTATGCAGCTCAATCAG    |
| C-L20Pf     | CGTAAGCGTCCGCTGAACTGC        |
| C-L20Pr     | GCAGTTCAGCGGACGCTTACG        |
| C-C23Rf     | CTGCTGAACCGCATTATCGCGG       |
| C-C23Rr     | CCGCGATAATGCGGTTCAAGCAG      |
| C-L34Pf     | GATATTCCTGTGTCCGGTCTATTTTCGC |
| C-L34Pr     | GCGAAATAGACCGGACACAGGAATATC  |
| C-Y42Nf     | CCAATGACATCAATCACCTGGTATC    |
| C-Y42Nr     | GATACCAGGTGATTGATGTCATTGG    |
| C-S46Ff     | CTATCACCTGGTATTCGCGCCATTG    |
| C-S46Fr     | CAATGGCGCGAATACCAGGTGATAG    |
| C-A47Tf     | CCTGGTATCCACGCCATTGATC       |
| C-A47Tr     | GATCAATGGCGTGGATACCAGG       |
| C-P48Lf     | GGTATCCGCGCTGTTGATCAAGC      |
| C-P48Lr     | GCTTGATCAACAGCGCGGATACC      |
| C-P48Sf     | GGTATCCGCGTCATTGATCAAGC      |
| C-P48Sr     | GCTTGATCAATGACGCGGATACC      |

|          |                            |
|----------|----------------------------|
| C-L53Pf2 | GATCAAGCAGCCGCCGCAAGGTTTC  |
| C-L53Pr2 | GAACCTTGCGGCGGCTGCTTGATC   |
| C-L53Sf  | GATCAAGCAGTCGCCGCAAGGTTTC  |
| C-L53Sr  | GAACCTTGCGGCGACTGCTTGATC   |
| C-P54Lf  | CAAGCAGTTGCTGCAAGGTTCAACG  |
| C-P54Lr  | CGTTGAACCTTGCAAGCAACTGCTTG |
| C-M59Kf  | GGTTCAACGAAGATCGCCACCG     |
| C-M59Kr  | CGGTGGCGATCTTCGTTGAACC     |
| C-I60Nf  | GTTCAACGATGAACGCCACCGACG   |
| C-I60Nr  | CGTCGGTGGCGTTCATCGTTGAAC   |
| C-A61Tf  | CAACGATGATCACCACCGACGTG    |
| C-A61Tr  | CACGTCGGTGGTGATCATCGTTG    |
| C-A61Vf  | CAACGATGATCGTCACCGACGTG    |
| C-A61Vr  | CACGTCGGTGACGATCATCGTTG    |
| C-T62Af  | GATGATCGCCGCCGACGTGGCC     |
| C-T62Fr  | GGCCACGTCGGCGGCGATCATC     |
| C-D63Vf  | GATGATCGCCACCGTCGTGGCCTCGC |
| C-D63Vr  | GCGAGGCCACGACGGTGGCGATCATC |
| C-V64Af  | GCCACCGACGCGGCCTCGCCGTTTC  |
| C-V64Ar  | GAACGGCGAGGCCGCGTCGGTGGC   |
| C-V64Df  | GCCACCGACGACGCCTCGCCGTTTC  |
| C-V64Dr  | GAACGGCGAGGCCGTCGTTCGGTGGC |
| C-V64Ef2 | GCCACCGACGAGGCCTCGCCGTTTC  |
| C-V64Er2 | GAACGGCGAGGCCTCGTCGGTGGC   |
| C-S66Pf  | CGACGTGGCCCCGCCGTTCTTTACG  |
| C-S66Pr  | CGTAAAGAACGGCGGGGCCACGTCCG |
| C-F68Sf  | GGCCTCGCCGTCTTTACGCCGATC   |

|          |                             |
|----------|-----------------------------|
| C-F68Sr  | GATCGGCGTAAAGGACGGCGAGGCC   |
| C-L74Pf  | CGCCGATCAAGCCGACCTTTATGG    |
| C-L74Pr  | CCATAAAGGTCGGCTTGATCGGCG    |
| C-S79Lf  | CCTTTATGGTGTGCTGATTCTGTC    |
| C-S79Lr  | GACAGAATCAGCAACACCATAAAGG   |
| C-L82Qf  | GTCGCTGATTCAGTCAGCGCCG      |
| C-L82Qr  | CGGCGCTGACTGAATCAGCGAC      |
| C-P85Lf  | CTGTCAGCGCTGGTGATTCTC       |
| C-P85Lr  | GAGAATCACCAGCGCTGACAG       |
| C-P97Tf  | CATTTATCGCCACAGCGCTGTATAAG  |
| C-P97Tr  | CTTATACAGCGCTGTGGCGATAAATG  |
| C-A98Vf  | CATTTATCGCCCCAGTGCTGTATAAGC |
| C-A98Vr  | GCTTATACAGCACTGGGGCGATAAATG |
| C-L99Pf  | CGCCCCAGCGCCGTATAAGCATGAAC  |
| C-L99Pr  | GTTTCATGCTTATACGGCGCTGGGGCG |
| C-L99Qf  | GCCCCAGCGCAGTATAAGCATGAAC   |
| C-L99Qr  | GTTTCATGCTTATACTGCGCTGGGGC  |
| C-Y100Cf | CCAGCGCTGTGTAAGCATGAACG     |
| C-Y100Cr | CGTTCATGCTTACACAGCGCTGG     |
| C-R104Cf | GTATAAGCATGAATGTCGCCTGGTG   |
| C-R104Cr | CACCAGGCGACATTCATGCTTATAC   |
| C-R105Cf | GCATGAACGTTGCCTGGTGGTG      |
| C-R105Cr | CACCACCAGGCAACGTTTCATGC     |
| C-P109Af | CTGGTGGTGGCGCTGCTGGTTTCC    |
| C-P109Ar | GGAAACCAGCAGCGCCACCACCAG    |
| C-L111Pf | GTGCCGCTGCCGTTTCCAGCTC      |
| C-L111Pr | GAGCTGGAAACCGGCAGCGGCAC     |

|           |                              |
|-----------|------------------------------|
| C-L116Pf  | GTTTCCAGCTCTCCGCTGTTTTATATC  |
| C-L116Pr  | GATATAAACAGCGGAGAGCTGGAAAC   |
| C-L116Rf  | GTTTCCAGCTCTCGCCTGTTTTATATC  |
| C-L116Rr  | GATATAAACAGGCGAGAGCTGGAAAC   |
| C-G121Df  | GTTTTATATCGACATGGCATTGCGCC   |
| C-G121Dr  | GGCGAATGCCATGTTCGATATAAAC    |
| C-F130Sf  | CTTTGTGGTCTCTCCGCTGGC        |
| C-F130Sr  | GCCAGCGGAGAGACCACAAAG        |
| C-P131Lf2 | CTTTGTGGTCTTTCTGCTGGCATTGCGC |
| C-P131Lr2 | GCCAAATGCCAGCAGAAAGACCACAAAG |
| C-A133Vf  | CTTTCCGCTGGTGTTTGGCTTC       |
| C-A133Vr  | GAAGCCAAACACCAGCGGAAAG       |
| C-L137Hf  | CATTTGGCTTCCATGCCAATACC      |
| C-L137Hr  | GGTATTGGCATGGAAGCCAAATG      |
| C-A141Ef  | CTTGCCAATACCGAGCCGGAAGGG     |
| C-A141Er  | CCCTTCCGGCTCGGTATTGGCAAG     |
| C-G144Rf  | GCGCCGGAACGCGTGCAGGTATC      |
| C-G144Rr  | GATACCTGCACGCGTTCCGGCGC      |
| C-V145Ef  | CGGAAGGGGAACAGGTATCCAC       |
| C-V145Er  | GTGGATACCTGTTCCCCTTCCG       |
| C-V147Ef  | GAAGGGGTGCAGGAATCCACCGAC     |
| C-V147Er  | GTCGGTGGATTCTGCACCCCTTC      |
| C-S148Pf  | GTGCAGGTACCGACCGACATC        |
| C-S148Pr  | GATGTCGGTTCGGTACCTGCAC       |
| C-D150Gf  | CAGGTATCCACCGGCATCGCCAGC     |
| C-D150Gr  | GCTGGCGATGCCGGTGGATACCTG     |
| C-D150Vf  | CAGGTATCCACCGTCATCGCCAGC     |

|          |                               |
|----------|-------------------------------|
| C-D150Vr | GCTGGCGATGACGGTGGATACCTG      |
| C-I151Tf | GTATCCACCGACACCGCCAGCTATTTAAG |
| C-I151Tr | CTTAAATAGCTGGCGGTGTCGGTGGATAC |
| C-Y154Hf | CATCGCCAGCCATTTAAGCTTC        |
| C-Y154Hr | GAAGCTTAAATGGCTGGCGATG        |
| C-F157Yf | GCTATTTAAGCTACGTTATGGCGCTG    |
| C-F157Yr | CAGCGCCATAACGTAGCTTAAATAGC    |
| C-A160Vf | GCTTCGTTATGGTGTGTTTATGG       |
| C-A160Vr | CCATAAACAGCACCCATAACGAAGC     |
| C-M163Kf | GCGCTGTTTAAGGCGTTTGGTG        |
| C-M163Kr | CACCAAACGCCTTAAACAGCGC        |
| C-S168Pf | CGTTTGGTGTCCCGTTTGAAGTGC      |
| C-S168Pr | GCACTTCAAACGGGACACCAAACG      |
| C-D188Vf | CTCGCCAGAAGTCTTACGCAAAAAACG   |
| C-D188Vr | CGTTTTTTGCGTAAGACTTCTGGCGAG   |
| C-V198Df | GTATGTGCTGGATGGTGCATTTCG      |
| C-V198Dr | CGAATGCACCATCCAGCACATAC       |
| C-G204Rf | GCATTCGTTGTCCGCATGTTGCTG      |
| C-G204Rr | CAGCAACATGCGGACAACGAATGC      |
| C-M205Kf | GTTGTCGGGAAGTTGCTGACG         |
| C-M205Kr | CGTCAGCAACTTCCCGACAAC         |
| C-M205Rf | GTTGTCGGGAGGTTGCTGACG         |
| C-M205Rr | CGTCAGCAACCTCCCGACAAC         |
| C-P209Lf | GTTGCTGACGCTGCCGGATGTC        |
| C-P209Lr | GACATCCGGCAGCGTCAGCAAC        |
| C-P210Rf | GCTGACGCCGCGGGATGTCTTC        |
| C-P210Rr | GAAGACATCCCGCGGCGTCAGC        |

|           |                             |
|-----------|-----------------------------|
| C-S214Pf  | GATGTCTTCCCGCAAACGCTG       |
| C-S214Pr  | CAGCGTTTGCGGGAAGACATC       |
| C-Q215Rf  | GTCTTCTCGCGCACGCTGTTG       |
| C-Q215Rr  | CAACAGCGTGCGCGAGAAGAC       |
| C-A219Ef  | CAAACGCTGTTGGAGATCCCGATG    |
| C-A219Er  | CATCGGGATCTCCAACAGCGTTTG    |
| C-L225Pf  | GATGTACTGTCCGTTTGAAATCGG    |
| C-L225Pr  | CCGATTTCAAACGGACAGTACATC    |
| C-A47del1 | GGATACCAGGTGATAGATGTC       |
| C-A47del2 | CCATTGATCAAGCAGTTGCCG       |
| C-G56del1 | GCAGTTGCCGCAATCAACGATGATC   |
| C-G56del2 | GATCATCGTTGATTGCGGCAACTGC   |
| C-A61del1 | GGTTCAACGATGATCACCGACGTGGCC |
| C-A61del2 | GGCCACGTGCGTGATCATCGTTGAACC |
| C-P71del1 | GCCGTTCTTTACGATCAAGCTGACC   |
| C-P71del2 | GGTCAGCTTGATCGTAAAGAACGGC   |
| C-Y42del1 | GCCAATGACATCCACCTGGTATCC    |
| C-Y42del2 | GGATACCAGGTGGATGTCATTGGC    |
| C-A47del3 | CACCTGGTATCCCCATTGATCAAG    |
| C-A47del4 | CTTGATCAATGGGGATACCAGGTG    |
| C-K51del1 | GCGCCATTGATCCAGTTGCCGCAAG   |
| C-K51del2 | CTTGCGGCAACTGGATCAATGGCGC   |
| C-P54del1 | GATCAAGCAGTTGCAAGGTTCAACG   |
| C-P54del2 | CGTTGAACCTTGCAACTGCTTGATC   |
| C-T58del1 | CCGCAAGGTTCAATGATCGCCACC    |
| C-T58del2 | GGTGGCGATCATTGAACCTTGCGG    |
| C-T62del1 | CAACGATGATCGCCGACGTGGCCTC   |



|              |                             |
|--------------|-----------------------------|
| C-T62del2    | GAGGCCACGTCGGCGATCATCGTTG   |
| C-A65del1    | GCCACCGACGTGTCGCCGTTCTTTAC  |
| C-A65del2    | GTAAAGAACGGCGACACGTCGGTGGC  |
| C-P67del1    | GACGTGGCCTCGTTCTTTACGCCG    |
| C-P67del2    | CGGCGTAAAGAACGAGGCCACGTC    |
| C-T70del1    | CGCCGTTCTTTCCGATCAAGCTG     |
| C-T70del2    | CAGCTTGATCGGAAAGAACGGCG     |
| C-K73del1    | CTTTACGCCGATCCTGACCTTTATG   |
| C-K73del2    | CATAAAGGTCAGGATCGGCGTAAAG   |
| C-Q55G56del1 | CAAGCAGTTGCCGTCAACGATGATC   |
| C-Q55G56del2 | GATCATCGTTGACGGCAACTGCTTG   |
| C-G56S57del1 | CAGTTGCCGCAAACGATGATCGCC    |
| C-G56S57del2 | GGCGATCATCGTTTGCGGCAACTG    |
| C-A133del1   | GTCTTTCCGCTGTTTGGCTTCCTTG   |
| C-A133del2   | CAAGGAAGCCAAACAGCGGAAAGAC   |
| C-N139del1   | GGCTTCCTTGCCACCGCGCCGGAAG   |
| C-N139del2   | CTTCCGGCGCGGTGGCAAGGAAGCC   |
| C-P142del1   | GCCAATACCGCGGAAGGGGTGCAG    |
| C-P142del2   | CTGCACCCCTTCCGCGGTATTGGC    |
| C-Q146del1   | CCGGAAGGGGTGGTATCCACCGAC    |
| C-Q146del2   | GTCGGTGGATAACCACCCCTTCCGG   |
| C-A152del1   | CCACCGACATCAGCTATTTAAGC     |
| C-A152del2   | GCTTAAATAGCTGATGTCGGTGG     |
| C-A160del1   | GCTTCGTTATGCTGTTTATGGCG     |
| C-A160del2   | CGCCATAAACAGCATAACGAAGC     |
| C-insA42f    | CAATGACATCGCATATCACCTGGTATC |
| C-insA42r    | GATACCAGGTGATATGCGATGTCATTG |

|            |                              |
|------------|------------------------------|
| C-insA47f  | CTGGTATCCGCGGCACCATTGATCAAG  |
| C-insA47r  | CTTGATCAATGGTGCCGCGGATAACCAG |
| C-insA51f  | GCCATTGATCGCCAAGCAGTTGCCGC   |
| C-insA51r  | GCGGCAACTGCTTGGCGATCAATGGC   |
| C-insA54f  | GATCAAGCAGTTGGCCCCGCAAGGTTT  |
| C-insA54r  | GAACCTTGCGGGGCCAACTGCTTGATC  |
| C-insG56f  | GTTGCCGCAAGGTGGTTCAACGATGATC |
| C-insG56r  | GATCATCGTTGAACCACCTTGCGGCAAC |
| C-insGG56f | GTTGCCGCAAGGTGGTGGTTCAACGATG |
| C-insGG56r | CATCGTTGAACCACCACCTTGCGGCAAC |
| C-insA58f  | CGCAAGGTTTCAGCAACGATGATCGCC  |
| C-insA58r  | GGCGATCATCGTTGCTGAACCTTGCG   |
| C-insA61f  | CAACGATGATCGCAGCCACCGACGTG   |
| C-insA61r  | CACGTCCGGTGGCTGCGATCATCGTTG  |
| C-insA65f  | CCACCGACGTGGCAGCCTCGCCGTTT   |
| C-insA65r  | GAACGGCGAGGCTGCCACGTCGGTGG   |
| C-insA67f  | GACGTGGCCTCGGCACCGTTCTTTACG  |
| C-insA67r  | CGTAAAGAACGGTGCCGAGGCCACGTC  |
| C-insA70f  | CCGTTCTTTGCAACGCCGATCAAGC    |
| C-insA70r  | GCTTGATCGGCGTTGCAAAGAACGG    |
| C-insA133f | GTCTTTCCGCTGGCAGCATTGGCTTC   |
| C-insA133r | GAAGCCAAATGCTGCCAGCGGAAAGAC  |
| C-insA139f | GCTTCCTTGCCGCAAATACCGCGCC    |
| C-insA139r | GGCGCGGTATTTGCGGCAAGGAAGC    |
| C-insA142f | CCAATACCGCGGCACCGGAAGGGGTG   |
| C-insA142r | CACCCCTTCCGGTGCCGCGGTATTGG   |
| C-insA146f | CGGAAGGGGTGGCACAGGTATCCAC    |

|            |                             |
|------------|-----------------------------|
| C-insA146r | GTGGATACCTGTGCCACCCCTTCCG   |
| C-insA152f | CACCGACATCGCAGCCAGCTATTTAAG |
| C-insA152r | CTTAAATAGCTGGCTGCGATGTCGGTG |
| C-insA160f | GCTTCGTTATGGCAGCGCTGTTTATG  |
| C-insA160r | CATAAACAGCGCTGCCATAACGAAGC  |

---

**Table S3. Oligonucleotides used in this study.**

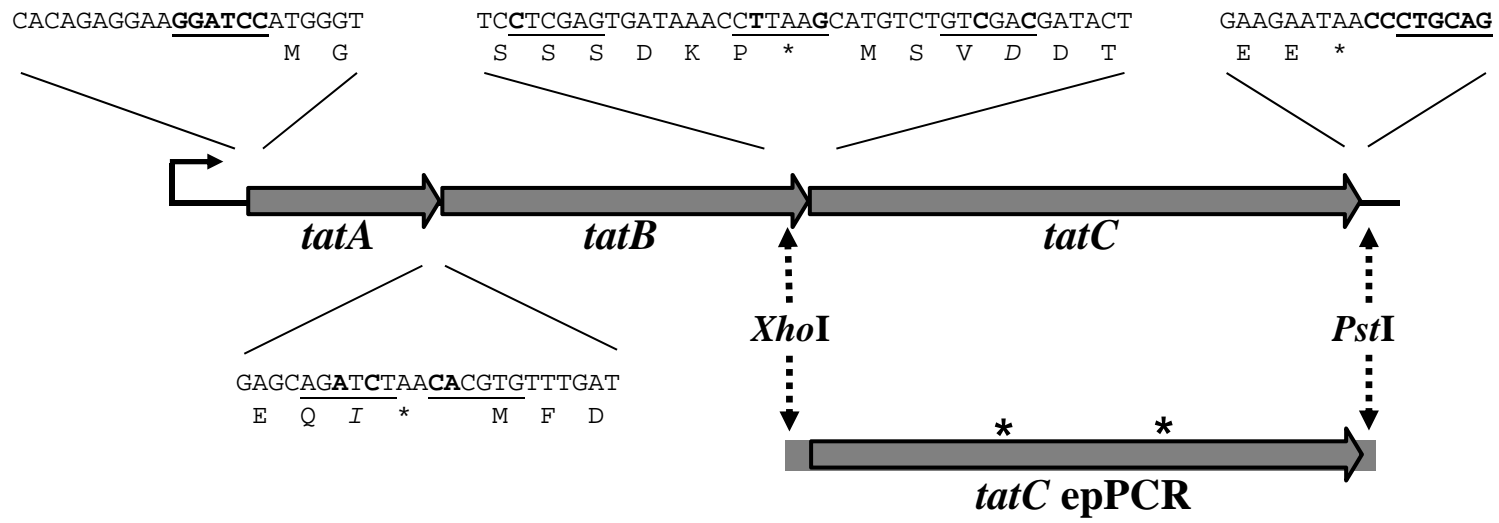

Kneuper *et al.* Fig S1

A

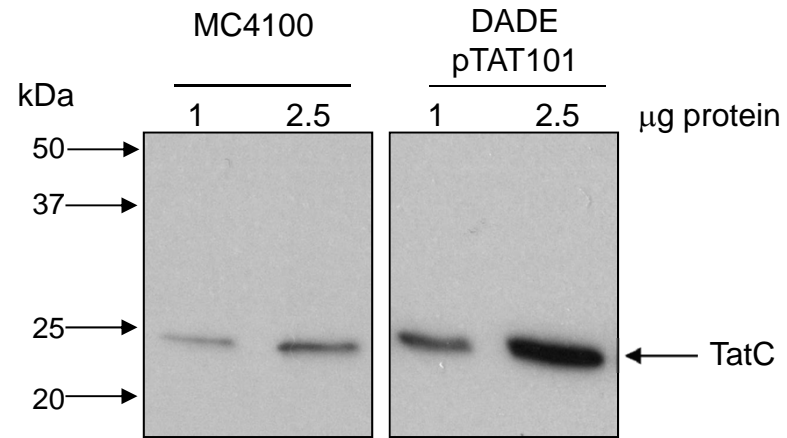

B

|                    | MC4100 |      | DADE pTAT101 |       |
|--------------------|--------|------|--------------|-------|
| µg total protein   | 1      | 2.5  | 1            | 2.5   |
| Image J area value | 2605   | 8658 | 10502        | 30867 |

|        |     |                                                                |                                                                              |                                                      |                                               |                                         |                                 |                     |     |
|--------|-----|----------------------------------------------------------------|------------------------------------------------------------------------------|------------------------------------------------------|-----------------------------------------------|-----------------------------------------|---------------------------------|---------------------|-----|
| Eco    | 1   | MSVEDTOPLITHLIE LRKR LLNC I IAV IV IP LCVLVFPAND IVHLVSA       | L IKQLP                                                                      | OGS TM IA TDVASFFF TP IK LTFMVS LLSAPV ILYQVWAF IA   | PALYKHERR LVVPLLVSS                           | LLFY IGMAPA                             | 125                             |                     |     |
| Cje    | 1   | MPEELRPHLIE LRKR LF ISVAC IVVMP IVCFALRSY ILD ILKAP            | L IAVLPEVAKHNVN                                                              | IEVQALF TAMKVSFFAAF IPSLPV IFWQWKFVA                 | PGLYDNEKR LV                                  | VFPVSPAS IMPAFGACFC                     | 122                             |                     |     |
| Dvu    | 1   | TLDDH LGE LRVR LVRCL IAVGLAFAGCYSPARKLFDLLMQP                  | LVKAMP                                                                       | EDSK LIP TALPRAFEVYMQVGLVAATFVASFF IFYO IMAF         | ISGLYBEKKNA IP                                | IAIPSSAFF IGGAAFC                       | 119                             |                     |     |
| Son    | 1   | MSQOPL IESHLE LRKLR IASV LIP ICSVWAND IYVMA I                  | LMOS PL                                                                      | IGGSM IA TDVAAPFPAPR LTIIVLSEFFVAVPV IYO             | IMSPVA PGLYKHERR LVMP                         | ILLSSV LVLV LG IAPA                     | 123                             |                     |     |
| Pay    | 1   | MSAD IPENDOOPL ISH LIE LRTR IERCVAAP L IPAG LFYFTQ K IY IIVSAP | LRVYLF                                                                       | EGATM IA TDVASFF IPPE LRTMMVALF LSPV I LHO HGE IAD   | PGLYKHERRVA                                   | ILLSSS I LLYAGMAFA                      | 130                             |                     |     |
| Xor    | 1   | MSLFDDACAESSL IEHLYE LRARLVRL IGLGVV LITLPPSRA IYSWLAAP        | L ISQPL                                                                      | LGO TM IAMPNARAFAPLELLTFVAVFVSPV LLYQAWAFVAPGL       | LYQRKK IA                                     | FILLASAVLFI IGCAPA                      | 129                             |                     |     |
| Lph    | 1   | MSFMI IHL IE LRORA IY TLLVFGALALFFP ISDQLPHLLVKP               | LLRS LP                                                                      | NOEQL IA TO TSSVF TP LK LAVDTALLTAPFA LLO LWRFRMPGL  | LYKKNQEO                                      | IRGT I ILS LLLVFGALFP                   | 120                             |                     |     |
| Dda    | 1   | MAVDQTOPL ISH LIE LRKR LNS I ISV LVP LALVFPAND IVQVSA          | L IKQLP                                                                      | AGASM IA TDVASFFF TP IK LTI IIVSVF LSAP LV LYQVWAFVA | PALYKHERR LMP                                 | LLVSSS LLYMGMAFA                        | 125                             |                     |     |
| Bau_Cd | 1   | MDKKE THL IGH LEE LRKR IYVTLAAFP LITAF LPVQD IYDW LIRD         | LDGK LAV LGR                                                                 | SS IIVVYMMLSG ICA IAS IPVAAYO LWRFPVAPALTK           | TKRVK TLMY                                    | IPGLFALF LAG ISPG                       | 118                             |                     |     |
| Bau_Cy | 1   | MTRMKVNQMS LLEH IAE LRKR LL IVALAFVVFV IAGFF LAKE I IYV LQET   | DEAKQL TLNAPN                                                                | LTDPLVYVMOFAP IIG IIVLTSV ILYO IWAFFVS               | PGLYKERRKVT                                   | LEY IPVS ILLF LAGLSFS                   | 124                             |                     |     |
| Syn    | 1   | MS TO LDN ITSAP TAPDY LDEV PDDVEMS LFDH IDE LRTR               | IF ILS LGAV LVGVVACF                                                         | IPVKE LVQVQV                                         | AG TVKFLQ LEPGE                               | FEVYSVAVAGYS ILMVSEFF                   | I IYO I IQVLPGLTRRRRR LLGP      | VV LGSV LFPAG LGFA  | 140 |
| Sau    | 1   | MSQOPL IESHLE LRKLR IASV LIP ICSVWAND IYVMA I                  | LMOS PL                                                                      | IGGSM IA TDVAAPFPAPR LTIIVLSEFFVAVPV IYO             | IMSPVA PGLYKHERR LVMP                         | ILLSSV LVLV LG IAPA                     | 123                             |                     |     |
| S11    | 1   | MLKFAARKK RDPFGMP LAEHLRE LRNR LARA LIA IYVY VVAAPYOK I        | INALTDP                                                                      | ILOS IGCEKSFAR LAQSEAGSFCQ                           | ITING LHGF TLA LVS LTAGVY LASPV               | LYO LWAFAV                              | PGLYKHERRVA IYAVATGAP L LAGAYFA | 150                 |     |
| Atu    | 1   | MSGD TEDKQPPL IEH LME LRTR LMS LGAPF IACFVAKHL IFLN            | IPYKVA                                                                       | WAG LDVAKSSL IY TAPOEFFP TO IKYAMFGAMV ISFPV         | IASO LYKFPVA                                  | PGLYKKNRAAF                             | LPL L IASP I LFL IGAALV         | 134                 |     |
| Mxa    | 1   | MS LADH LIE LRER LMRCT IAVL IGLT IS LVPAKE ILLGLMQP            | WADA LPPENSL                                                                 | IY TSG IEE LNV LKMGVYCG IFT LITPV                    | ILMO IKGFSV                                   | PGLYKERRFA                              | APFVAFGS IAF L LGAAPC           | 120                 |     |
| Yps    | 1   | MAVDDTOPL ISH LIE LRKR LNC I IT IIVV L VLVFPAND IYVLSAP        | L IKQLP                                                                      | AGASM IA TDVASFFF TP IK LTFMVS LLSAPV ILYQVWAF IA    | PALYKHERR LMVPL                               | ISSS                                    | LLFY LGMAFA                     | 125                 |     |
| Mam    | 1   | MO TPG IFKK LDPRRRSRVNP DGTMS LVDH LHE LRNR                    | LL ISVAAV LTT IIGF IYV THGV                                                  | PGFNS LGEW LRGPYCS LPDSARAN                          | IAPDGECLR LLA TAFDQFM RLRL                    | VA LAAGVV LACPVW LYO LWAF               | I TPG LYKERRFA                  | MAPVSEGM LF ISGAVLA | 159 |
| Eco    | 126 | YFVVFF LARGF PAN                                               |                                                                              |                                                      |                                               |                                         | TAPEG                           |                     | 144 |
| Cje    | 123 | YFVVV BLAPKFL IN                                               |                                                                              |                                                      |                                               |                                         | TELEED                          |                     | 142 |
| Dvu    | 120 | YFQVFF YAREPFMC                                                |                                                                              |                                                      |                                               |                                         | SATDR                           |                     | 138 |
| Son    | 124 | Y IYFVVVGF PAN                                                 |                                                                              |                                                      |                                               |                                         | TAPEG                           |                     | 142 |
| Pay    | 131 | YFVLFV I IYHFFAS                                               |                                                                              |                                                      |                                               |                                         | V TPEG                          |                     | 149 |
| Xor    | 130 | YFVLV IYAVFH LTT                                               |                                                                              |                                                      |                                               |                                         | V KPDV                          |                     | 148 |
| Lph    | 121 | YFV LVPYMFQFFAQ                                                |                                                                              |                                                      |                                               |                                         | ALPEG                           |                     | 139 |
| Dda    | 126 | YFVVFF LARSFFAQ                                                |                                                                              |                                                      |                                               |                                         | TAPEG                           |                     | 144 |
| Bau_Cd | 119 | YFVLFV IVDSFDTH                                                |                                                                              |                                                      |                                               |                                         | ISSG                            |                     | 136 |
| Bau_Cy | 125 | Y I I IYVVDPMKR                                                |                                                                              |                                                      |                                               |                                         | ESDPL                           |                     | 143 |
| Syn    | 141 | Y YAL IYAL KFFVS                                               |                                                                              |                                                      |                                               |                                         | Y GADV                          |                     | 159 |
| Sau    | 99  | YVGVFP I IYPAK                                                 |                                                                              |                                                      |                                               |                                         | LSLTL                           |                     | 117 |
| S11    | 151 | Y AVLP TSAKVL IE                                               |                                                                              |                                                      |                                               |                                         | F TEND                          |                     | 168 |
| Atu    | 135 | Y VFF IYVYVFF LAMQ                                             |                                                                              |                                                      |                                               |                                         | Q LPVDG                         |                     | 156 |
| Mxa    | 121 | YFAV IYPMYF TLLNEEETLAEOR LD TAR DRADDA LRF ERLGEEAEEAGR       | I AKE TS TO LRAE GGOAPAPEVAPAA SVEM TGR LDG LGR LLDAA SVYGAQSRGV LROAVEKRVAV | TAYEKKDFAAAAAAMDGSAS LLAG                            | IAP TR TEE LAG LWR DEKE                       |                                         |                                 | 278                 |     |
| Yps    | 126 | Y VVFP LARGFFAK                                                |                                                                              |                                                      |                                               |                                         | TAPEG                           |                     | 144 |
| Mam    | 160 | Y VVLSKALS FLL                                                 |                                                                              |                                                      |                                               |                                         | YGSQV                           |                     | 177 |
| Eco    | 145 | YQVSTDIASVLSF YMA LFMAGVYSFVYVVA IVLLCWMG                      | ITSPED LRKKRYV LVGAFVGM LITTP                                                | DVFSQ TLLA IYMYCLEK                                  | IGVFFSEFYV YKGRNREENDAEAESEKTEE               |                                         |                                 | 258                 |     |
| Cje    | 143 | YFNPIYITIGTYVDF TKVVVAFGLAFEMPV IAPFFAK IGLIDDSF               | LKRHR IA VLV IPVFSAFMTTP                                                     | DVLSQ LMA GFLCGLVGLS IL IVQKVNPAKDKESDE              |                                               |                                         |                                 | 245                 |     |
| Dvu    | 139 | YILPMSLSEY LGFALKMLLAFG I IPEMP LFTFLAKLGL IL                  | TAGMMRRGRKYA ILG IF IYAA ILTTP                                               | DVFSQ LMA GFLCGLVGLS IL IVQKVNPAKDKESDE              |                                               |                                         |                                 | 257                 |     |
| Son    | 143 | YQVATDISSYLDFV LK LFFAFGLSFE IP IAVVLLCWAQV                    | TSPEP LKQKRPY I VGFVYVGM LITTP                                               | DV ISQ TMH AVPML ILPEAG LFAARFYS                     | ----- KPDDE TDEES TNN                         |                                         |                                 | 249                 |     |
| Pay    | 150 | YVMMTDIASVLD FVMTTFFAFGVAPE IPVAVV LLVW                        | IG IVDVY LKK IRYVY IIGCFVGM LITTP                                            | D IFSQ TLLAVPMW LLPELG ILCSM                         | IRKRGHPDDE TDADKQDQPPATTP                     |                                         |                                 | 266                 |     |
| Xor    | 149 | YIAITPDANSYLDEV LA IFFAFGASFELPVALV                            | ILVLLGWV TPQQLSEGRGYA                                                        | IVG IF IYAAVDTPE                                     | DVVSQ LMA LALPMLLYE LG IMASRAVA               | ----- KDAASNAAG                         |                                 | 251                 |     |
| Lph    | 140 | YRLMPDMAYA IDEFTRMLLLFGPFSQVFL                                 | ICLVLVK THFTVE PL IK IRYVY IYVAF IYGM LITTP                                  | DVFSQ TLLA IYMYLLE IGVFFSEFYV YKGRNREENDAEAESEKTEE   |                                               |                                         |                                 | 241                 |     |
| Dda    | 145 | YFLIATD IYNYIDF IYMALEMAQVSEFVVA IVLLCWMG                      | SVVYEE LKQRK DYLVLGAFVGM LITTP                                               | DVFSQ TLLA IYMYLLE IGVFFSEFYV YKGRNREENDAEAESEKTEE   |                                               |                                         |                                 | 256                 |     |
| Bau_Cd | 137 | YHPTMFTADRYFRFMYNLSLE FGLPEMP LVVMP LTR                        | GL ILYE YLAKARKLSYELL IYVS ILITTP                                            | DF ISDF LVM ILLV LPEYVY TLSAEPYKREBEE TAAAA          |                                               |                                         |                                 | 242                 |     |
| Bau_Cy | 144 | YNNQV IGINEPYFHLLOLT IYFGLLPQMPV                               | ILMFLTR LG IV PMP LAK IRYA YFTLLV IAA LITTP                                  | ELLSHMMVYVPELL IYVE IS IL ISKAA YKAKSSAARDVSSGO      |                                               |                                         |                                 | 254                 |     |
| Syn    | 160 | YVEQLWS IDKYFEPV LLLMPS TGLAQI IP                              | I IQVVLGFL LG IYSSQMLKGRVY IYVAMV LGA IITPS                                  | TDPLTQS LLAGAVGLYVFG IGVVLLIG                        |                                               |                                         |                                 | 254                 |     |
| Sau    | 118 | YISPV IYKAYL IEL IYMLF TFGLLPQLP                               | IYPMGLAKFGL IDTTS LKHRYKY IYFACV LAS IYAPP                                   | DI I TNL ILLTLP LILLPEFMSF                           | IVK FTCRQKPP TH                               |                                         |                                 | 218                 |     |
| S11    | 169 | YVDNLLPLDEL LLDLV TRM VVVFGLSPEL                               | LP LLLVW LNF TGLCKRMLGWWRAM                                                  | IMG IYTLFAA IATPS TDPLTM                             | IMLAGP IYVLYFAVVVLS LNDRRKAR LEA LEPDDDEASD   | LDLITPED IGEVEPVYTTARA LPEQATKDRVNGVDDV |                                 | 316                 |     |
| Atu    | 157 | YVAVLSLMPKVS EYDLS L IMLTVLSFGVLVQLV                           | PVTTLLARVGL IYLSDW LREKRRKFA                                                 | IVMAFVVAAVDTPE DPMQO IGHAPLA                         | I IYVE IS IYMAR IYERKRAAESKTS                 | LEET                                    |                                 | 267                 |     |
| Mxa    | 279 | YLA TARAARVAFYRFLISMRDQSLV LLE IYAFG I                         | IIEHLE IYVLA LLGVLGVRKSSW LRFYOR                                             | IAVYVGL IYDA I IYTP TSMYVY LMA GFLM LCEH             | LV LLVWVYERRARRNSAETG                         |                                         |                                 | 401                 |     |
| Yps    | 145 | YV IATD IYKYIDF YMA LFMAGV ISEFVE                              | IAT ILLCWAQV TTPRALKIKRKYV YVGFARVGM LITTP                                   | DVLSQ TLLA IYMYLLE IGVFFSEFYV YKGRNREENDAEAESEKTEE   |                                               |                                         |                                 | 258                 |     |
| Mam    | 178 | YV TALSQDQYFGFL IN LLLVFG                                      | ISEFVPL I IMLN LVS ILYEYRLSAWRRL                                             | IYGLVYFAAFA TPGSDF                                   | YSMLA LACALTYLLEFA IO IAR LNDREKARRAAMEVPEDEA | ----- AD IGSVEP IYEP                    | APVSGT TAGRA TVDDDA             | 317                 |     |
| Eco    |     |                                                                |                                                                              |                                                      |                                               |                                         |                                 |                     |     |
| Cje    |     |                                                                |                                                                              |                                                      |                                               |                                         |                                 |                     |     |
| Dvu    |     |                                                                |                                                                              |                                                      |                                               |                                         |                                 |                     |     |
| Son    |     |                                                                |                                                                              |                                                      |                                               |                                         |                                 |                     |     |
| Pay    |     |                                                                |                                                                              |                                                      |                                               |                                         |                                 |                     |     |
| Xor    |     |                                                                |                                                                              |                                                      |                                               |                                         |                                 |                     |     |
| Lph    |     |                                                                |                                                                              |                                                      |                                               |                                         |                                 |                     |     |
| Dda    |     |                                                                |                                                                              |                                                      |                                               |                                         |                                 |                     |     |
| Bau_Cd |     |                                                                |                                                                              |                                                      |                                               |                                         |                                 |                     |     |
| Bau_Cy |     |                                                                |                                                                              |                                                      |                                               |                                         |                                 |                     |     |
| Syn    |     |                                                                |                                                                              |                                                      |                                               |                                         |                                 |                     |     |
| Sau    |     |                                                                |                                                                              |                                                      |                                               |                                         |                                 |                     |     |
| S11    |     |                                                                |                                                                              |                                                      |                                               |                                         |                                 |                     |     |
| Atu    |     |                                                                |                                                                              |                                                      |                                               |                                         |                                 |                     |     |
| Mxa    |     |                                                                |                                                                              |                                                      |                                               |                                         |                                 |                     |     |
| Yps    |     |                                                                |                                                                              |                                                      |                                               |                                         |                                 |                     |     |
| Mam    |     |                                                                |                                                                              |                                                      |                                               |                                         |                                 |                     |     |

Kneuper et al. Fig S3
